# Supplementary material for: Ultrafast electron shuttling suppresses the energy transfer process in Mn-doped CsPbCl3 nanocrystals
Source: Royal Society of Chemistry journal article supplement (doi:10.1039/d4cp01815j), 2024-01-01
Supplement: d4cp01815j1.pdf [file d4cp01815j1.pdf]

## Electronic Supplementary Information

### Ultrafast Electron Shuttling Suppresses the Energy Transfer Process in Mn-doped CsPbCl<sub>3</sub> Nanocrystals

Tushar Debnath\*

Nano Physical Spectroscopy Group, Department of Chemistry, School of Natural Sciences, Shiv  
Nadar Institution of Eminence, Delhi NCR, Uttar Pradesh-201314, India

Email: [tushar.debnath@snu.edu.in](mailto:tushar.debnath@snu.edu.in)

#### 1. Methods

##### 1.1. Materials

Cesium carbonate (CsCO<sub>3</sub>), lead chloride (PbCl<sub>2</sub>), manganese chloride (MnCl<sub>2</sub>), 1-octadecene (ODE), oleic acid (OA), oleylamine (OLA), hexane and 4-nitro phenol (4-NP) were obtained from Sigma-Aldrich.

##### 1.2. Synthesis of undoped and Mn-doped CsPbCl<sub>3</sub> NCs

At first, a stock cesium oleate solution was prepared by adding 0.407 gm of CsCO<sub>3</sub> in 1.25ml OA and 20 ml ODE solvent and continuously stirred at 120 °C until complete dissolution of CsCO<sub>3</sub>.

Then, 0.188 mmol of PbCl<sub>2</sub> in 0.5 ml OA, 0.5 ml OLA and 5 ml ODE were added in a 30 ml glass vial and stirred at 120 °C for 30 min so that complete dissolution of PbCl<sub>2</sub> occurs and a clear solution was formed. The solution temperature was raised to 165 °C and then 400 µl of previously prepared Cs-oleate solution was injected in one shot, leading to formation of CsPbCl<sub>3</sub> NCs. The reaction was quenched instantly by putting the reaction vessel in an ice-water bath.

For Mn-doping, instead of 0.188 mmol of PbCl<sub>2</sub>, 0.047 mmol of PbCl<sub>2</sub> and 0.141 mmol of MnCl<sub>2</sub> were used (Pb: Mn feeding ratio = 1:3), and the rest of the reaction procedure is same as for the undoped CsPbCl<sub>3</sub> NCs.

The reaction mixture for both undoped and Mn-doped CsPbCl<sub>3</sub> NCs was then centrifuged at 10000 rpm for 10 min and the supernatant was discarded. The precipitate was dissolved in 1 ml hexane and again centrifuged at 6000 rpm for another 6 min. The supernatant was kept for further use.

### 1.3. Preparation of Mn-doped CsPbCl<sub>3</sub>/4-NP nanocomposite

The Mn- CsPbCl<sub>3</sub>/4-NP nanocomposite was prepared via a post-synthetic strategy where we added the 4-NP hexane solution directly in the Mn-CsPbCl<sub>3</sub> solution under continuous stirring.

### 2. Characterizations:

TEM images were captured by JEOL JEM 2100F (maximum acceleration voltage: 200 kV) and the images were analyzed using the imageJ Software. The steady-state UV-Vis and PL spectra were recorded by using PerkinElmer Lambda 35 UV-vis spectrophotometer and HORIBA Jobin Yvon Fluoromax-4 spectrofluorometer, respectively. Femtosecond transient absorption (TA) spectroscopic experiments were performed in a custom-built setup. Briefly, a laser pulse of ~100 fs at 1 KHz, and 800 nm output from a regenerative amplifier is split into 400 nm pump pulse (via frequency doubling using a BBO crystal) and a broadband white light probe pulse (using CaF<sub>2</sub> crystal) which are then focused and overlapped on the sample target. A motorized delay stage is placed between the pump and probe pulse. An optical chopper at a frequency of 0.5 KHz is placed in the pump arm to read out the changes in the absorbance for one pump-probe cycle. In all the experiments, we used the ~100 fs pump pulse at a very low fluence, typically ~6 μJ/cm<sup>2</sup>, in order to minimize the effect of multiexciton generation, exciton-exciton annihilation, etc.

### 3. Results and Discussions:

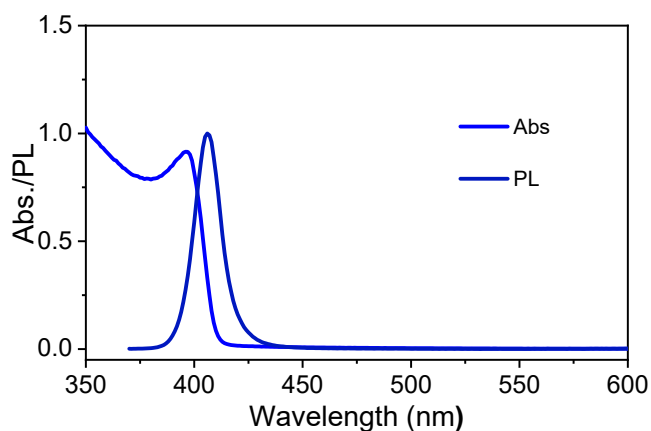

Figure S1. Steady state UV-vis absorption and PL spectra of the undoped CsPbCl<sub>3</sub> (Un-PNC), having a PL quantum yield of ~4.7%.

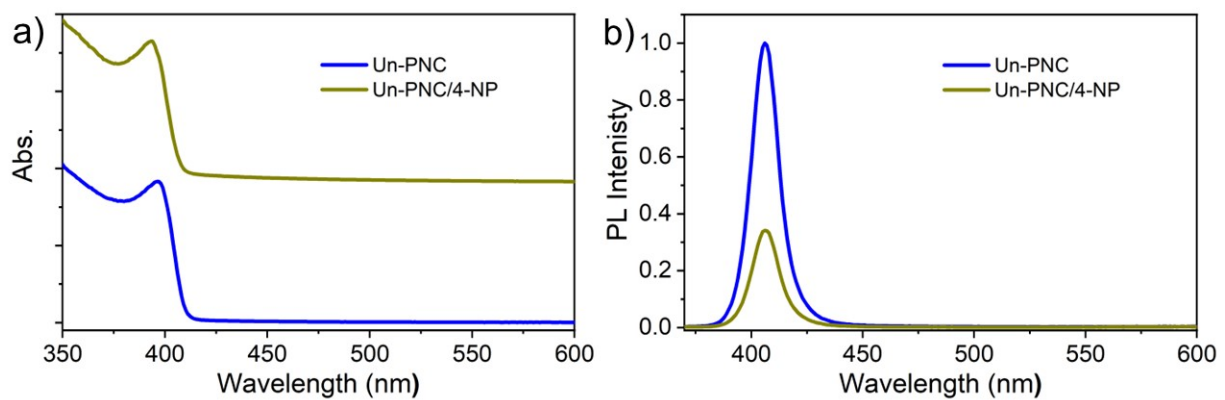

Figure S2. a) UV-vis absorption and b) PL spectra of Un-PNC in the absence and presence of the 4-NP molecule.

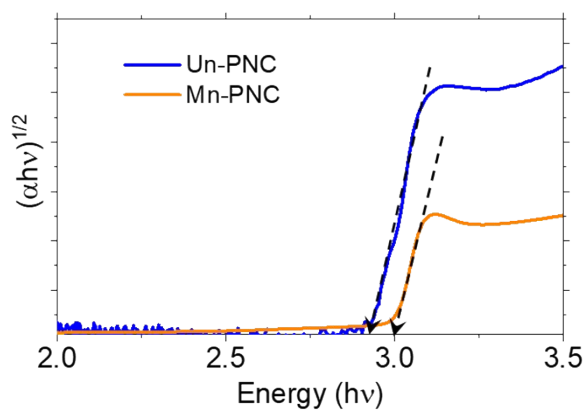

Figure S3. Tauc plot of Un-PNC and Mn-PNC, calculated from their respective absorption spectra. The bandgap ( $E_g$ ) of Un-PNC = 2.93 eV and  $E_g$  of Mn-PNC = 3.0 eV.

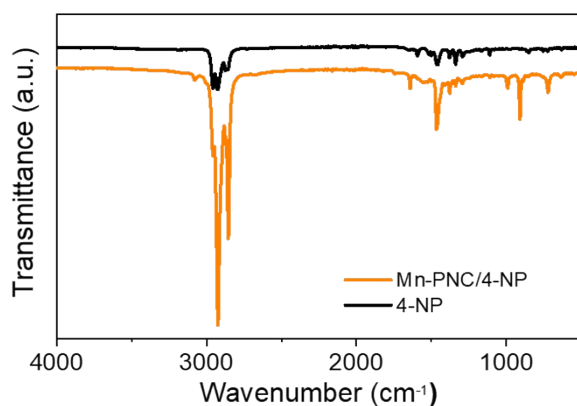

Figure S4. FTIR spectra of the 4-NP molecule and Mn-PNC/4-NP nanocomposite in the 4000 – 500 cm<sup>-1</sup> range.

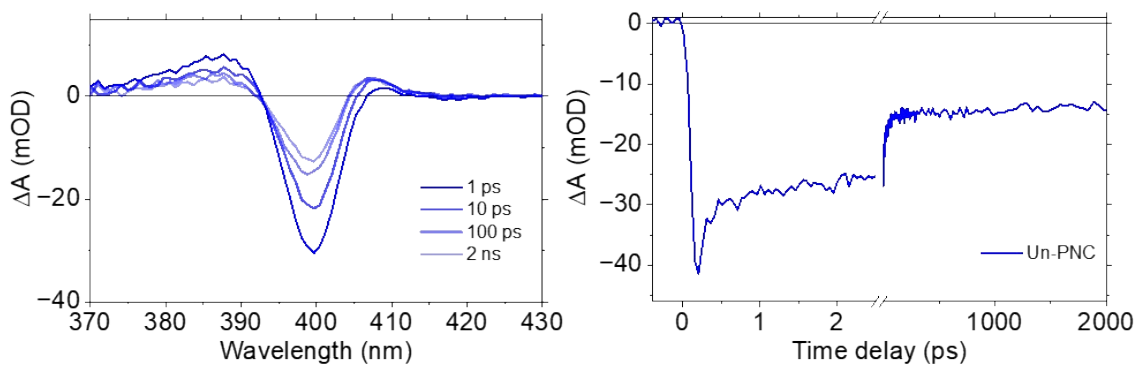

Figure S5. TA spectra and kinetics (at the bleach maxima) of the Un-PNC upon resonant excitation with a 100-fs pump pulse.

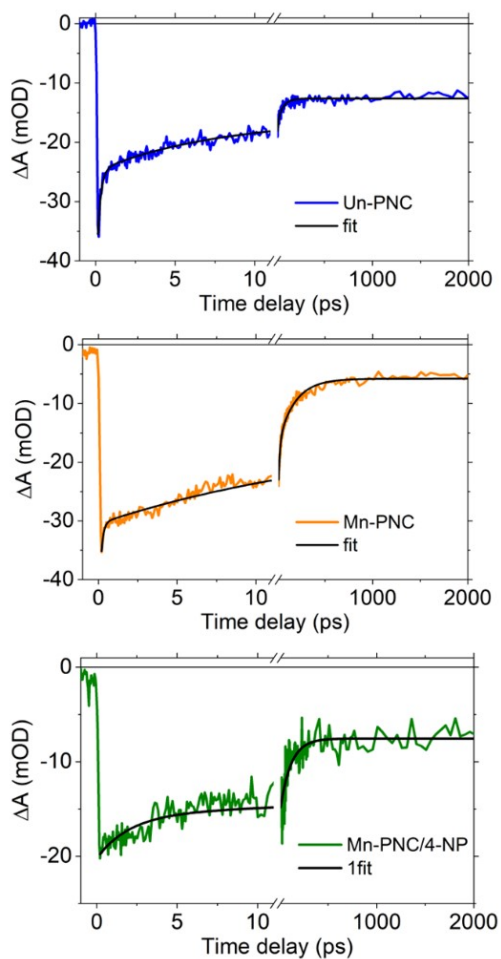

Figure S6. TA transient and their multi-exponential fitting for the Un-PNC, Mn-PNC and Mn-PNC/4-NP nanocomposite.

Table S1. Multiexponential fitting parameters of the bleaching transients of the Un-PNC, Mn-PNC and Mn-PNC/4-NP nanocomposite.

|             | $\tau_1$ (%) | $\tau_2$ (%) | $\tau_3$ (%) | $\tau_4$ (%) |
|-------------|--------------|--------------|--------------|--------------|
| Un-PNC      | 368 fs (42)  | 19 ps (25)   | -            | >1 ns (33)   |
| Mn-PNC      | 140 fs (40)  | 15 ps (25)   | 175 ps (21)  | >1 ns (14)   |
| Mn-PNC/4-NP | -            | 2 ps (24)    | 110 ps (42)  | >1 ns (34)   |
